# Supplementary material for: Microwave-Solvothermal Synthesis of Mesoporous CeO2/CNCs Nanocomposite for Enhanced Room Temperature NO2 Detection
Source: MDPI journal article supplement (doi:10.3390/nano14100812), 2024-05-07
Supplement: s1 [file s1]

## Supporting Information

### Microwave-solvothermal synthesis of mesoporous $\text{CeO}_2/\text{CNCs}$ nanocomposite for room temperature $\text{NO}_2$ detection

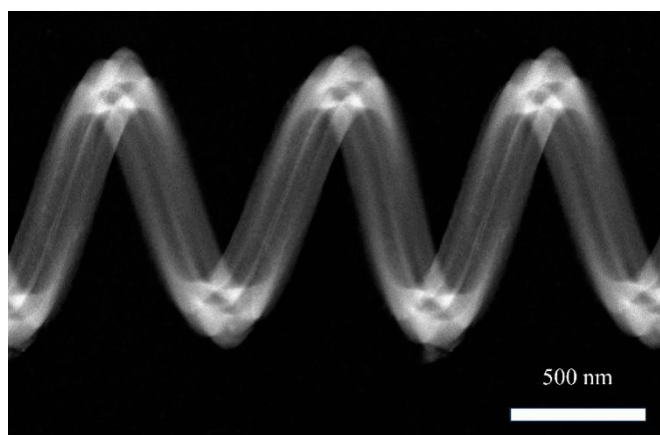

Figure S1. TEM image of CNCs

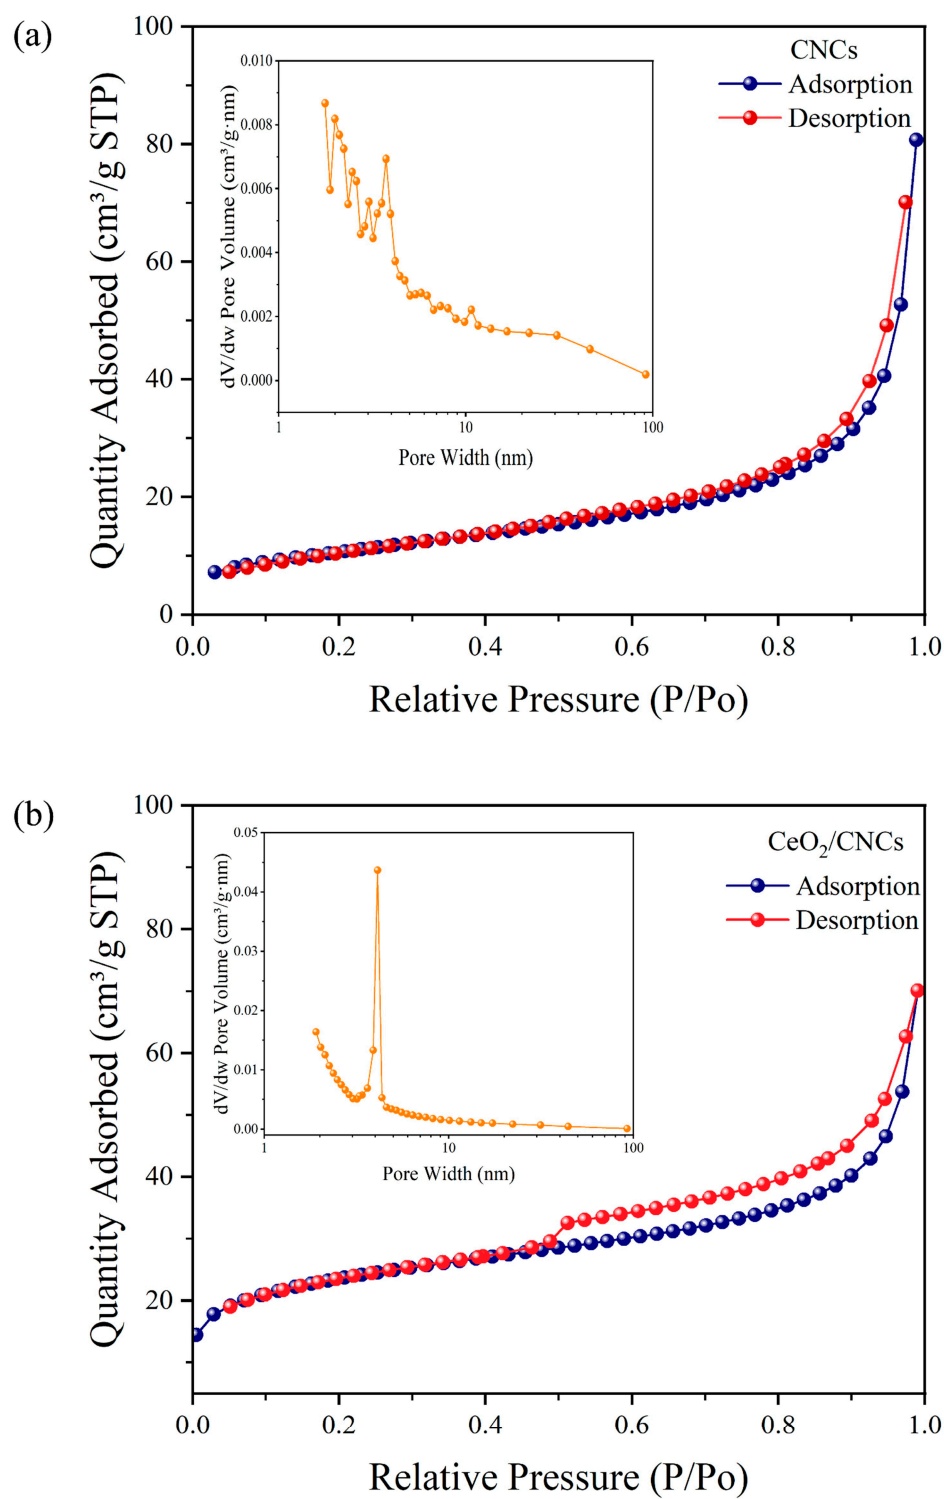

Figure S2. The N<sub>2</sub> adsorption and desorption isotherms and pore size distribution (the inset) curve of bare CNCs (a) and (b) CeO<sub>2</sub>/CNCs nanocomposite

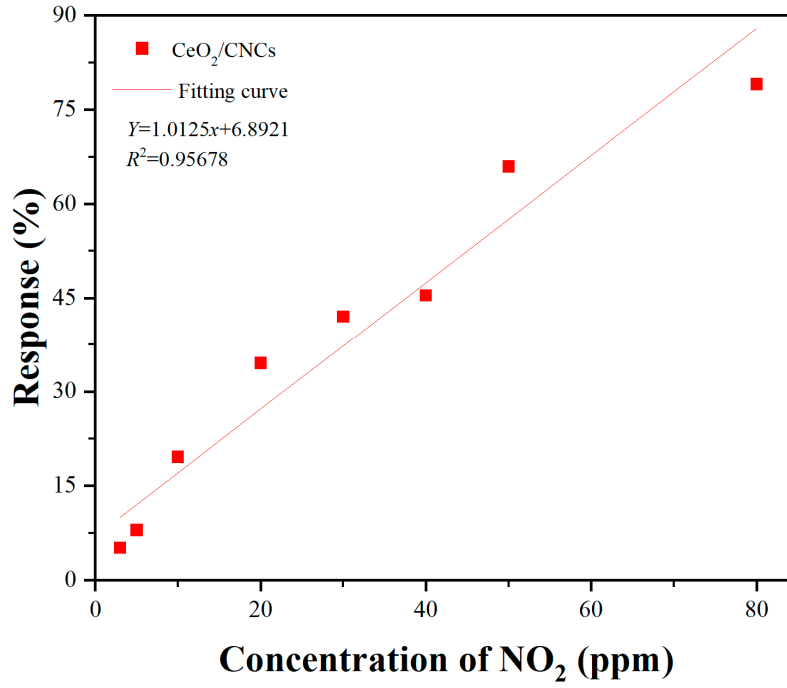

Figure S3. Fitting curve of the CeO<sub>2</sub>/CNCs composites

The process of calculation of noise level ( $RMS_{Noise}$ ) and limit of detection (LOD):<sup>[S1]</sup>

$$RMS_{Noise} (ppm^{-1}) = \sqrt{V_x^2 / n} \quad \text{where} \quad V_x^2 = \sum (Y_i - \bar{Y})^2 \quad (1)$$

$$Limit\ of\ detection\ (ppm) = 3 \times \frac{RMS_{Noise}}{Slope} \quad (2)$$

[S1] Duy, L. T.; Kim, D. J.; Trung, T. Q.; Dang, V. Q.; Kim, B. Y.; Moon, H. K.; Lee, N. E. High Performance Three-Dimensional Chemical Sensor Platform Using Reduced Graphene Oxide Formed on High Aspect-Ratio Micro-Pillars. *Adv. Funct. Mater.* 2015, 25, 883–890.

Table S1. The ratios of cerium and oxygen of as-prepared samples.

| Sample   | O <sub>lat</sub> | O <sub>vac</sub> | O <sub>ads</sub> | Ce <sup>3+</sup> | Ce <sup>4+</sup> |
|----------|------------------|------------------|------------------|------------------|------------------|
| Sample 1 | 84.6             | 14.11            | 1.29             | 47.98            | 52.02            |
| Sample 2 | 65.25            | 29.52            | 5.23             | 37.36            | 62.64            |
| Sample 3 | 56.49            | 35.6             | 7.91             | 22.42            | 77.58            |
| Sample 4 | 53.02            | 34.69            | 12.29            | 19.38            | 80.62            |
